# Supplementary material
Source: PubMed Central journal article supplement (PMC5546982)

**Figure S1:** Transplanted GFP-expressing MGE cells (green) extend long processes, both caudal (B) and rostral (C) to and well beyond the injection sites. DH: dorsal horn; VH: ventral horn. Scale bar equals 300  $\mu\text{m}$  in A and 100  $\mu\text{m}$  in B, C.

**Figure S2:** There is no difference in GAD 65 or GAD 67 expression levels between MGE- and medium-injected IL-31Tg mice (N=5; Student's t-test).

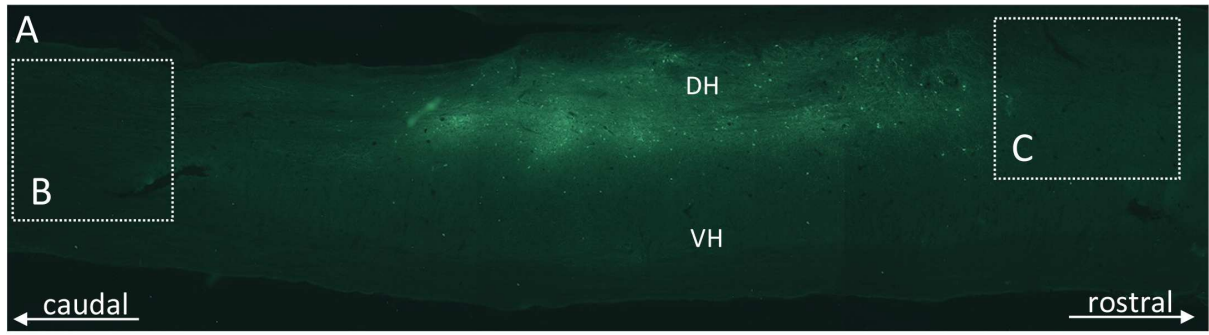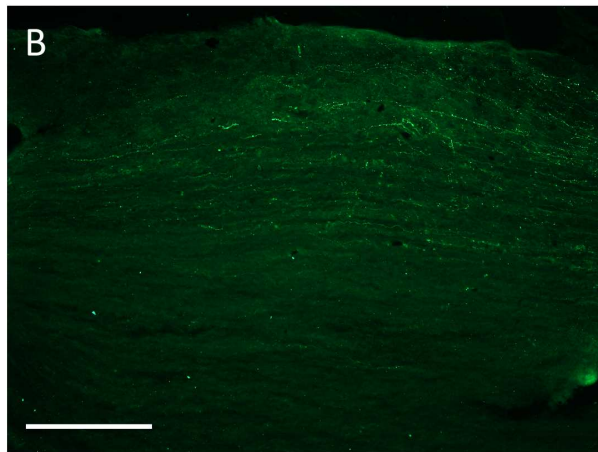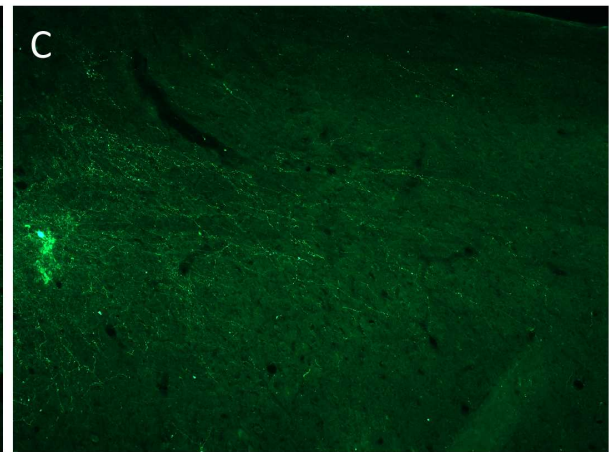

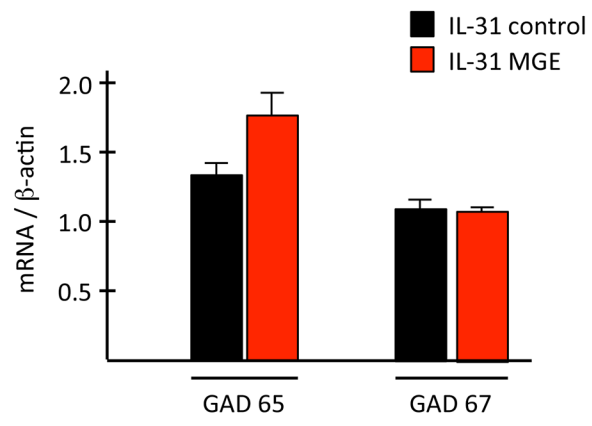

Supplement: NIHMS861305-supplement-supplement_1.pdf [file NIHMS861305-supplement-supplement_1.pdf]
